# Supplementary material for: Synbiotic Intervention with an Adlay-Based Prebiotic and Probiotics Improved Diet-Induced Metabolic Disturbance in Mice by Modulation of the Gut Microbiota
Source: MDPI journal article supplement (doi:10.3390/nu13093161), 2021-09-10
Supplement: s1 [file s1]

**Table S1. Primers.**

| <b>Primer name</b> | <b>Forward primer (5'-end to 3'-end)</b> | <b>Reverse primer (5'-end to 3'-end)</b> |
|--------------------|------------------------------------------|------------------------------------------|
| MCP-1              | TTAAAAACCTGGATCGGAACCAA                  | GCATTAGCTTCAGATTTACGGGT                  |
| TNF-a              | TGGGAGTAGACAAGGTACAACCC                  | CATCTTCTCAAAATTCGAGTGACAA                |
| IL-6               | CCAGTTGCCTTCTTGGGACT                     | GGTCTGTTGGGAGTGGTATCC                    |
| LBP                | GTGGCTGCTGAATCTCTTCC                     | GAGCGGTGATTCCGATTAAA                     |
| Leptin             | TCTCCGAGACCTCCTCCATCT                    | TTCCAGGACGCCATCCAG                       |
| CD11c              | CTGGATAGCCTTTCTTCTGCTG                   | GCACACTGTGTCCGAAGTC                      |
| GAPDH              | AACTTTGGCATTGTGGAAGG                     | GGATGCAGGGATGATGTTCT                     |
